# Supplementary material for: Deficient GATA6–CXCR7 signaling leads to bicuspid aortic valve
Source: Dis Model Mech. 2024 Sep 10;17(9):dmm050934. doi: 10.1242/dmm.050934 (PMC11413932; doi:10.1242/dmm.050934)
Supplement: Table S1. Lethality Table [file DMM-17-050934-TableS1.xlsx]

## Sheet: Table S1. Lethality Gata6;NkxCr
Stage	Gata6flox/+; Nkx2.5+/+	Gata6flox/flox; Nkx2.5+/+	Gata6flox/+; Nkx2.5Cre/+	Gata6flox/flox; Nkx2.5Cre/+	Alive	Dead	Total	Resorptions	Litter
E12.5	0	6	4	3	13	0	13	2	2
E15.5	3	4	1	0	8	0	8	0	1
E16.5	22	28	24	5	79	4	83	2	12
