# Supplementary material for: Deficient GATA6–CXCR7 signaling leads to bicuspid aortic valve
Source: Dis Model Mech. 2024 Sep 10;17(9):dmm050934. doi: 10.1242/dmm.050934 (PMC11413932; doi:10.1242/dmm.050934)
Supplement: Table S3. Resources of materials and methods [file DMM-17-050934-TableS3.xlsx]

## Sheet: Sheet 1. CRISPR-Cas9
Organism	Genetic line	Background	Type	Genomic target	Sequence (5' - 3')	Length (bp)
Mouse	Gata6STOP	Mib1R530X/+	tracrRNA	Gata6 Exon 2	AGCAUAGCAAGUUAAAAUAAGGCUAGUCCGUUAUCAACUUGAAAAAGUGGCACCGAGUCGGUGCUUU	67bp
		Mib1V943F/V943F	crRNA	Gata6 Exon 2	UACGUGCCCACCACGCGCGUGUUUUAGAGCUAUGCU	36bp
			ssODN	Gata6 Exon 2	GCCTGGGTGGGCACCCGCTCCGCCCGCGTGATTGCTGGGCCCGCTGCCCGCCCCTTGAAGGTAGGGCAGGCCGGACAGCATGGAGCACTATCACGTGGTGGGCACGTAGACCGGGGAGCTGGCTGCC	127bp

## Sheet: Sheet 2. Microinjection summary
Organism	Genetic line	Background	[Cas9 protein] (ng/uL)	[crRNA] (ng/μL)	[ssODN] (ng/μL)	Born	Weaned	Mutant	Founders	Nº MI
Mouse	Gata6STOP	Mib1R530X/+	20-30	0.406-0.61	10	25	10	6	1	13

## Sheet: Sheet 3. Primers Genotyping
Organism	Genetic line	Primer sequence (5'- 3')	Annealing temperature	WT amplicon (bp)	Mut/tg amplicon (bp)
Mouse	Gata6STOP	For: ATGTGGGCAAGGTAGACGCT	56ºC	360 bp	350 bp
		Rev: ATTAGAAGAAAACAAACGACC
	Gata6Flox	For: GTGGTTGTAAGGCGGTTTGT	58ºC	159 bp	271 bp
		Rev: ACGCGAGCTCCAGAAAAAGT
	Tie2-Cre	For: GGGAAGTCGCAAAGTTGTGAGTT	58ºC	-	500 bp
		Rev: CTAGAGCCTGTTTTGCACGTTC
	Nkx2.5-Cre	For: GATGACTCTGGTCAGAGATACCTG	60ºC	-	583 bp
		Rev: GCGCACTCACTTTAATGGGAAGAG
	Mef2c-AHFCre	For: TCGATGCAACGAGTGATGAGG	56ºC	-	250 bp
		Rev: CGTAAGTGCCTTCTCTACACC
	Notch1KO	For: GATATCGTGGTGCATACCCTCCTG	60ºC	400 bp	-

## Sheet: Sheet 4. Sema3c_Probe
Gene	Primer sequence (5'- 3')	Probe length (bp)
Sema3C	For: GGGAGTGGAGCGTTCAGCCC	757 bp
	Rev: AGGCCCCTCCTGGGCAAGTT

## Sheet: Sheet 5. Antibodies
Type	Antigen	Amplification	IHC Dilution	Host	Type	Company	Catalog number
Primary	α-Isl1	-	1/60	Mouse	Monoclonal	DSHB	39.4D5
	α-IsoB4-647	-	1/200	Mouse	Monoclonal	Invitrogen	I32450
	α-Endomucin (V.5C7)	-	1/100	Rat	Monoclonal	Santa Cruz Biotechnology	sc-53941
	α-BrdU (B44)	TSA	1/100	Mouse	Monoclonal	BD Biosciences	347580
	α-SMA-Cy3	-	1/200	Mouse	Monoclonal	Sigma-Aldrich	C6198
	α-ERG	-	1/100	Rabbit	Monoclonal	Abcam	ab110639
Secondary	Biotinylated α-mouse IgG (H+L)		1/100	Goat	Polyclonal	Vector laboratories	BA-9200
	α-Rat IgG (H+L), Alexa Fluor 647		1/200	Goat	Polyclonal	Invitrogen	A21247
	α-Rabbit IgG (H+L), Alexa Fluor 647		1/200	Goat	Polyclonal	Invitrogen	A21245
	α-Mouse IgG (H+L), Alexa Fluor 488		1/200	Goat	Polyclonal	Thermo Fisher Scientific	A-11029

## Sheet: Sheet 6. Drug concentration
Drug	Concentration	Description	Company	Catalog Number	References
VUF11207	100nM	CXCR7 agonist	EMD Millipore	239824	(Wijtmans et al., 2012)
	1µM
AMD3100	1µM	CXCR7 allosteric agonist and CXCR4 antagonist	ApexBio	A2025	(De Clercq, 2000; Debnath et al., 2013)
					Debnath et al., 2013)

## Sheet: Antibodies
	Antigen	Label or dye	Amplification	IHC Dilution	Host	Type	Company	Catalog number
Primary	α-N1ICD (D3B8)			0.01	Rabbit	Monoclonal	Cell Signalling Technology	4147S
	α-SMA-Cy3			0.005	Mouse	Monoclonal	Sigma-Aldrich	C6198
	α-ERG			0.01	Rabbit	Monoclonal	Abcam	ab110639
Secondary	α-Rabbit IgG (H+L)	Biotin	TSA-Fluorescein	0.005	Goat	Polyclonal	Vector laboratories	BA-1000
	α-Rabbit IgG (H+L)	Alexa Fluor 647		0.005	Goat	Polyclonal	Invitrogen	A21245
