# Supplementary material for: Deficient GATA6–CXCR7 signaling leads to bicuspid aortic valve
Source: Dis Model Mech. 2024 Sep 10;17(9):dmm050934. doi: 10.1242/dmm.050934 (PMC11413932; doi:10.1242/dmm.050934)
Supplement: Table S4. Statistics [file DMM-17-050934-TableS4.xlsx]

## Sheet: Fig1B. Ascending aort. insuff
Figure 1: Gata6STOP/+ mice have severe aortic insufficiency and systolic dysfunction.

## Sheet: Fig1B. Descending aort. insuff
Figure 1: Gata6STOP/+ mice have severe aortic insufficiency and systolic dysfunction.

## Sheet: Fig1C. EF
Figure 1: Gata6STOP/+ mice have severe aortic insufficiency and systolic dysfunction.

## Sheet: Fig1C. FS
Figure 1: Gata6STOP/+ mice have severe aortic insufficiency and systolic dysfunction.

## Sheet: Fig2A. OFT lenght
Figure 2: Gata6STOP/+ mice OFT is shorter and narrower and associates with reduced

## Sheet: Fig2A.  Tortuosity
Figure 2: Gata6STOP/+ mice OFT is shorter and narrower and associates with reduced proliferation.

## Sheet: Fig2D. Intervalve distance
Figure 2: Gata6STOP/+ mice OFT is shorter and narrower and associates with reduced proliferation.

## Sheet: Fig.2D Major Axis
Figure 2: Gata6STOP/+ mice OFT is shorter and narrower and associates with reduced proliferation.

## Sheet: Fig2D. OFT area 
Figure 2: Gata6STOP/+ mice OFT is shorter and narrower and associates with reduced proliferation.

## Sheet: Fig2D. Circularity
Figure 2: Gata6STOP/+ mice OFT is shorter and narrower and associates with reduced proliferation.

[truncated: 29 more sheets: Fig2F.  %BRDU+ DAPI+, Fig2F. %BRDU+ SMA+, Fig2F. %BRDU+ ERG+, Fig3B. % BAV, Fig3B. %VSD, Fig3D. %ISL1+ DAPI+, Fig3D. %ISL1+ SMA+, Fig3D. %ISL1+ IsoB4+, Fig6C. VUF Migration, Fig6C. VUF Invasion, Fig6D. VUF Proliferation, Fig6F. AMD Migration, Fig6F. AMD Invasion, Fig6F. AMD Proliferation, Fig S1D. % BAV, Fig S1D. % VSD, Fig S2. LV VOL; d, Fig S2. LV VOL; s, Fig S2. LV Mass C, Fig S2. MVE-A …]
